# Supplementary material for: Regioselective synthesis of heterocycles by sigmatropic rearrangement: passage to 3,11a-dimethyl-6a,11a-dihydro-1H,6H-pyrano[3′,4′:5,6]thiopyrano[4,3-b][1]benzofuran-1-one
Source: Royal Society of Chemistry journal article supplement (doi:10.1039/b206287a), 2002-01-01
Supplement: b206287a.doc [file b206287a.doc]

*General procedure for the synthesis of 4-(4/-aryloxybut-2/-ynylthio)-6-methyl-2-pyrone* ***5****(a,b,c) :*

To a mixture of 4-mercapto-6-methylpyran-2-one **3** (obtained from 2.8g, 10 mmol of compound **2**) and 1-aryloxy-4-chlorobut-2-yne (10 mmol) **4 a,b,c** in chloroform (100 ml) was added a solution of benzyl triethyl ammonium chloride (BTEAC, 0.5g, 1.8 mmol) in 1% aqueous NaOH (100 ml) and the mixture was magnetically stirred at room temperature for 4h. The reaction mixture was then diluted with water (50 ml). Chloroform layer was taken out and washed with 2(N) HCl (1x 20 ml), brine (1x20 ml), water (2x20 ml) and dried (Na2SO4). Evaporation of chloroform left a gummy residue which was subjected to column chromatography. Elution of the column with benzene-ethyl acetate (9:1) afforded compounds **5 a,b,c**. All the compounds **5 a-,b,c** were recrystallised from chloroform-petroleum ether. The yields were calculated with respect to the quantity of compound **2** used for the preparation of compound **3**.

**Compound 5a**:

Yield 55%; mp. 112-113 0C; max: 221, 271, 302 nm; IR (KBr) max: 1700, 1630, 1475, 1220 cm-1; 1H-NMR (CDCl3, 300 MHz) :  2.19 (s, 3H, C6-C**H**3), 3.66 (s, 2H, -SC**H**2), 4.78 (s, 2H, -OC**H**­2), 5.82 (s, 1H, C3-**H**), 5.92 (s, 1H ,C5-**H**), 6.91-7.38 (m, 4H, Ar**H**); MS m/z 320, 322 (M+); Anal Calcd. For C16H13ClO3S: C, 59.90; H, 4.05. Found C, 60.14; H, 4.21 %.

**Compound** **5b**:

Yield 55%; mp. 140-141 0C; max: 222, 270, 301 nm; IR (KBr) max: 1700, 1620, 1470, 1220 cm-1; 1H-NMR (CDCl3, 300 MHz) :  2.21 (s, 3H, C6-C**H**3), 3.66 (s, 2H, -SC**H**2), 4.77 (s, 2H, -OC**H**­2), 5.81 (s, 1H, C3-**H**), 5.90 (s, 1H ,C5-**H**), 6.92 (d, *J* 9Hz, 1H, Ar**H**), 7.16 (dd, *J* 9Hz, 3Hz, 1H, ArH), 7.36 (d, *J* 3Hz, 1H, ArH); MS m/z 354, 356, 358 (M+); Anal Calcd. For C16H12Cl2O3S: C, 54.08; H, 3.38. Found C, 54.32; H, 3.54 %.

**Compound 5c**:

Yield 54%; mp. 77-79 0C; max: 221, 270, 302 nm; IR (KBr) max: 1700, 1620, 1470, 1215 cm-1; 1H-NMR (CDCl3, 300 MHz) :  2.19 (s, 3H, -C**H**3), 2.22 (s, 3H, -C**H**3), 3.67 (s, 2H, -SC**H**2), 4.71 (s, 2H, -OC**H**­2), 5.82 (s, 1H, C3-**H**), 5.94 (s, 1H ,C5-**H**), 6.86-7.16 (m, 4H, Ar**H**); MS m/z 300 (M+); Anal Calcd. For C17H16O3S: C, 68.00; H, 5.33. Found C, 68.25; H, 5.51 %.

*General procedure for the synthesis of 4-aryloxymethyl-7-methylthiopyrano[3,2-c]pyran-5-ones* ***6*** *(a,b,c):*

Compounds **5ab,c** (200 mg) were refluxed in chlorobenzene (3 ml) for 5 h. The reaction mixture was then cooled and directly subjected to column chromatography over silica gel. *C*hlorobenzene was eluted out with petroleum ether. Compounds **6a,b,c** were obtained when the column was eluted with benzene-petroleum ether (3**:**1). These compounds **6 a,b,c** were recrystallised from chloroform-petroleum ether.

**Compound** **6a**:

Yield 82%; mp. 126-127 0C; max: 222 , 248, 302 nm; IR (KBr) max: 1690, 1620, 1480, 1260 cm-1; 1H-NMR (CDCl3, 300 MHz) :  2.23 (s, 3H, C7-C**H**3), 3.38 (d, *J* 6 Hz, 2H, C2-**H**), 5.13 (brs, 2H, -C**H**2OAr), 6.03 (s, 1H, C8-**H**), 6.12 (t, *J* 6 Hz,1H, C3-**H**), 6.86-7.36 (m, 4H, Ar**H**); MS m/z 320, 322 (M+); Anal Calcd. For C16H13ClO3S: C, 59.90; H, 4.05. Found C, 60.18; H, 4.24 %.

**Compound** **6b**:

Yield 85%; mp. 160-161 0C; max: 226 , 246, 294 nm; IR (KBr) max: 1690, 1620, 1470, 1270 cm-1; 1H-NMR (CDCl3, 300 MHz) :  2.23 (s, 3H, C7-C**H**3), 3.37 (d, *J* 6 Hz, 2H, C2-**H**), 5.11 (brs, 2H, -C**H**2OAr), 6.03 (s, 1H, C8-**H**), 6.06 (t, *J* 6 Hz, 1H, C3-**H**), 6.90 (d, *J* 9Hz, 1H, Ar**H**), 7.15 (d, *J* 9Hz, 1H, Ar**H**), 7.34 (brs, 1H, Ar**H**); MS m/z 354, 356, 358 (M+); Anal Calcd. For C16H12Cl2O3S: C, 54.08; H, 3.38. Found C, 54.23; H, 3.56 %.

**Compound** **6c**:

Yield 75%; mp. 114-116 0C; max: 220, 248, 301 nm; IR (KBr) max: 1690, 1620, 1480, 1270 cm-1; 1H-NMR (CDCl3, 300 MHz) :  2.23 (s, 3H, -C**H**3), 2.24 (s, 3H, C**H**3), 3.36 (d, *J* 6 Hz, 2H, C2-**H**), 5.07 (brs, 2H, -C**H**2OAr), 6.00 (s, 1H, C8-**H**), 6.04 (t, *J* 6 Hz,1H, C3-**H**), 6.82-7.15 (m, 4H, Ar**H**); MS m/z 300 (M+); Anal Calcd. For C17H16O3S: C, 68.00; H, 5.33. Found C, 68.16; H, 5.52 %.

*General procedure for the synthesis of Benzofuro[3,2-c]-6a,11a-dihydro-3,11a-dimethylthiopyranopyran-1-ones* ***11*** *(a,b,c) :*

Compounds **6a,b,c** (100 mg) were refluxed in *o*-dichlorobenzene (3 ml) for 10-11 h. The reaction mixture was then cooled and directly subjected to column chromatography over silica gel. *o*-Dichlorobenzene was eluted out with petroleum ether. Compounds **11 a,b,c** were obtained when the column was eluted with benzene. These compounds **11 a, b, c** were recrystallised from chloroform-petroleum ether.

**Compound** **11a**:

Yield 60%; mp. 143-144 0C; max: 211, 255, nm; IR (KBr) max: 1690, 1620, 1450, 1230 cm-1; 1H-NMR (CDCl3, 300 MHz) :  1.88 (s, 3H, C11a-C**H**3), 2.17 (s, 3H, C3-C**H**3), 2.88 (dd, *J* 9.9, 13.5 Hz, 1H, C6-**H**), 3.05 (dd, *J* 3.9, 13.5 Hz, 1H, C6-**H**), 3.57 (dd, *J* 3.9, 9.9 Hz, 1H, C6a-**H**), 5.78 (s, 1H, C4-**H**), 6.84-7.36 (m, 3H, Ar**H**); MS m/z 320, 322 (M+); Anal Calcd. For C16H13ClO3S: C, 59.90; H, 4.05. Found C, 60.07; H, 4.18%.

**Compound** **11b**:

Yield 67%; mp. 157-158 0C; max: 211, 255, nm; IR (KBr) max: 1690, 1620, 1435, 1250 cm-1; 1H-NMR (CDCl3, 300 MHz) :  1.89 (s, 3H, C11a-C**H**3), 2.17 (s, 3H, C3-C**H**3), 2.84 (dd, *J* 9.9, 13.5 Hz, 1H, C6-**H**), 3.05 (dd, *J* 3.9, 13.5 Hz, 1H, C6-**H**), 3.56 (dd, *J* 3.9, 9.9 Hz, 1H, C6a-**H**), 5.78 (s, 1H, C4-**H**), 7.06 (m, 1H, Ar**H**), 7.19 (m, 1H, Ar**H**); MS m/z 354, 356, 358 (M+); Anal Calcd. For C16H12Cl2O3S: C, 54.08; H, 3.38. Found C, 53.89; H, 3.27%.

**Compound** **11c**:

Yield 65%; gummy mass; max: 211, 256, nm; IR (KBr) max: 1690, 1620, 1445, 1240 cm-1; 1H-NMR (CDCl3, 300 MHz) :  1.84 (s, 3H, C11a-C**H**3), 2.16 (s, 3H, -C**H**3), 2.23 (s, 3H, -C**H**3), 2.83 (dd, *J* 9.9, 13.5 Hz, 1H, C6-**H**), 3.07 (dd, *J* 3.9, 13.5 Hz, 1H, C6-**H**), 3.50 (dd, *J* 3.9, 9.9 Hz, 1H, C6a-**H**), 5.77 (s, 1H, C4-**H**), 6.79-7.12 (m, 3H, Ar**H**); MS m/z 300 (M+); Anal Calcd. For C17H16O3S: C, 68.00; H, 5.33. Found C, 68.21; H, 5.15%.
